# Supplementary material for: Global patterns of lightning properties derived by OTD and LIS
Source: Copernicus journal article supplement (doi:10.5194/nhess-14-2715-2014), 2014-10-08
Supplement: Supplementary file 2 [file nhess-14-2715-2014-supplement.zip]

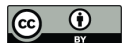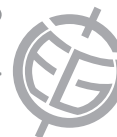

## *Supplement of*

# **Global patterns of lightning properties derived by OTD and LIS**

**S. Beirle et al.**

*Correspondence to:* S. Beirle ([steffen.beirle@mpic.de](mailto:steffen.beirle@mpic.de))

- Supplement-Cover-Letter.pdf
- Mapdata\_LIS.hdf
- Mapdata\_OTD.hdf
- supplement\_final.pdf
